# Supplementary material for: Influence of Nε-Lysine Acetylation on the Formation of Protein Aggregates and Antibiotic Persistence in E. coli
Source: MDPI journal article supplement (doi:10.3390/molecules29020383), 2024-01-12
Supplement: s1 [file s1]

**Table S1.** Levels of aggregates, acetylated proteins and viable cells in *E. coli* strains with impaired acetylation/deacetylation pathways. The bacteria were grown in TB7 medium supplemented with 0.4% glucose or 25 mM acetate.

|           | Strains                | Aggregates (%) | Relative level of acetylation | Viable cells (%) |
|-----------|------------------------|----------------|-------------------------------|------------------|
| + glucose | WT                     | 5.0 ± 0.50     | 1.0 ± 0.09                    | 65 ± 5           |
|           | $\Delta ackA$          | 7.3 ± 0.78     | 2.1 ± 0.20                    | 98 ± 2           |
|           | $\Delta pta$           | 5.1 ± 0.51     | 0.4 ± 0.04                    | 75 ± 6           |
|           | $\Delta ackA-pta$      | 5.5 ± 0.57     | 0.2 ± 0.03                    | 75 ± 7           |
|           | $\Delta acs$           | 3.9 ± 0.37     | 0.6 ± 0.06                    | 60 ± 5           |
|           | $\Delta yfiQ$          | 4.1 ± 0.38     | 0.3 ± 0.02                    | 67 ± 6           |
|           | $\Delta cobB$          | 5.2 ± 0.54     | 2.7 ± 0.22                    | 60 ± 6           |
|           | $\Delta ackA-pta-acs$  | 2.9 ± 0.24     | 0.01 ± 0.002                  | 55 ± 4           |
|           | $\Delta ackA-pta-yfiQ$ | 3.2 ± 0.28     | 0.1 ± 0.01                    | 55 ± 5           |
| + acetate | WT                     | 7.0 ± 0.64     | 3.7 ± 0.04                    | 60 ± 4           |
|           | $\Delta ackA$          | 7.0 ± 0.55     | 3.7 ± 0.39                    | 70 ± 6           |
|           | $\Delta pta$           | 9.2 ± 0.53     | 4.4 ± 0.51                    | 95 ± 4           |
|           | $\Delta ackA-pta$      | 7.5 ± 0.70     | 2.9 ± 0.32                    | 80 ± 4           |
|           | $\Delta acs$           | 6.1 ± 0.80     | 3.4 ± 0.37                    | 81 ± 6           |
|           | $\Delta yfiQ$          | 6.4 ± 0.63     | 3.0 ± 0.32                    | 60 ± 5           |
|           | $\Delta cobB$          | 7.2 ± 0.60     | 3.9 ± 0.41                    | 70 ± 6           |
|           | $\Delta ackA-pta-acs$  | 5.1 ± 0.76     | 0.2 ± 0.02                    | 65 ± 5           |
|           | $\Delta ackA-pta-yfiQ$ | 4.9 ± 0.50     | 0.2 ± 0.03                    | 65 ± 5           |
